# Supplementary material for: Evaluation of Blue Honeysuckle Berries (Lonicera caerulea L.) Dried at Different Temperatures: Basic Quality, Sensory Attributes, Bioactive Compounds, and In Vitro Antioxidant Activity
Source: MDPI journal article supplement (doi:10.3390/foods13081240), 2024-04-18
Supplement: s1 [file s1]

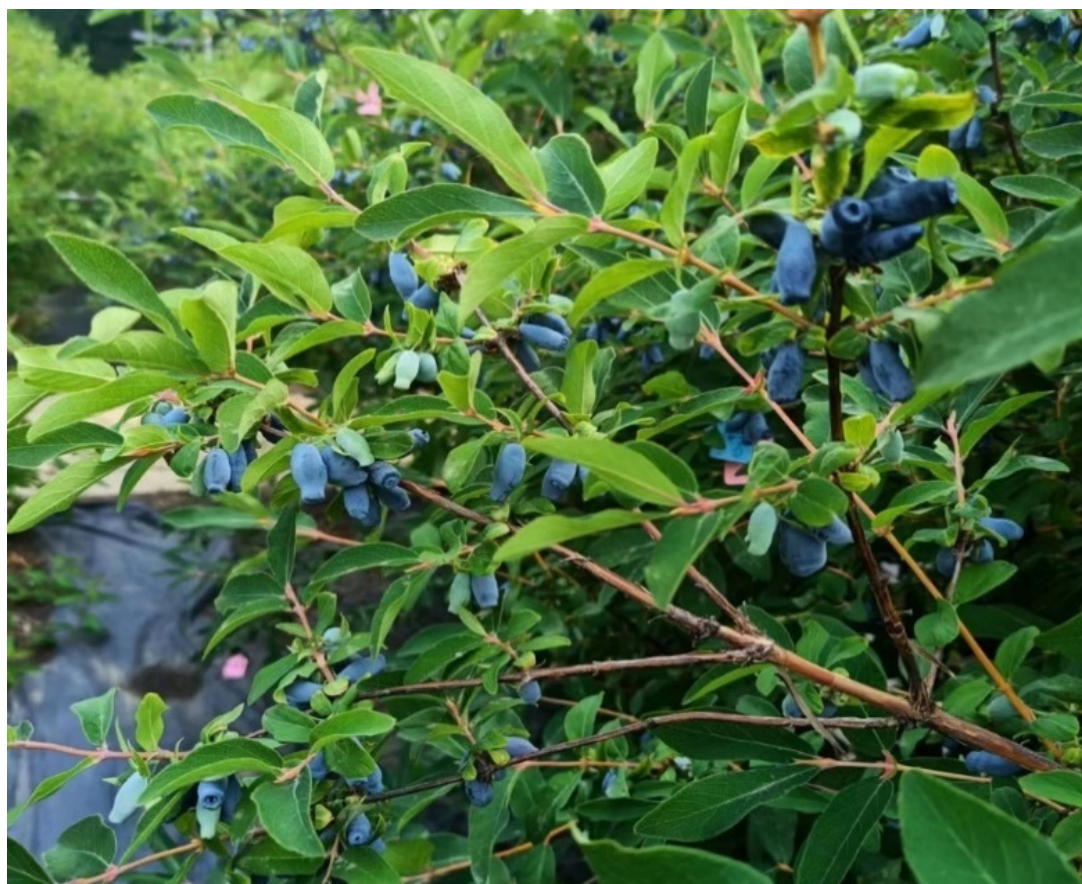

**Figure S1.** Blue honeysuckle (*Lonicera caerulea* L.) cultivar 'Lanjingling' (by Min Yu; July, 2023)

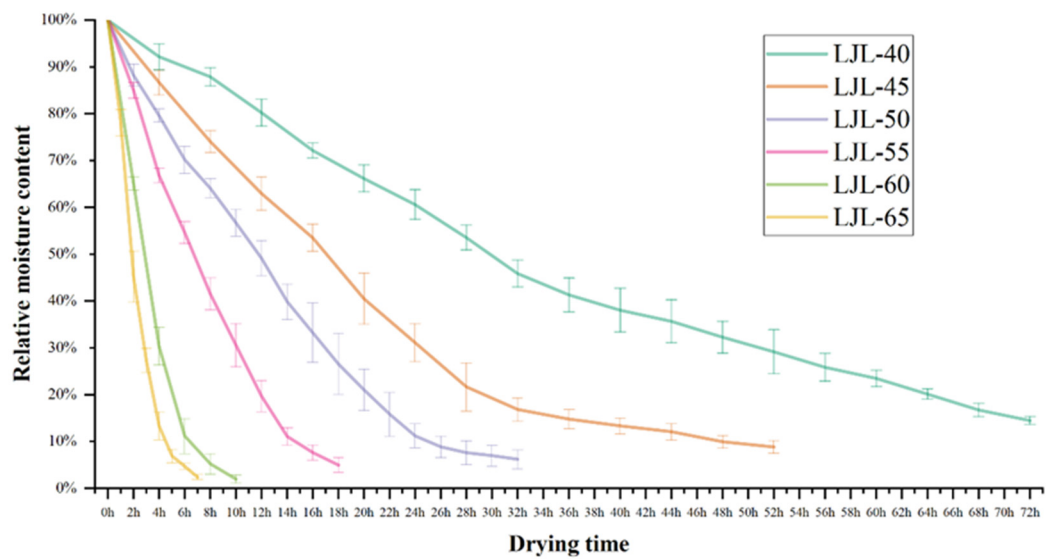

**Figure S2.** Drying curves of blue honeysuckle berries under different temperatures  
LJL-40: 40°C, LJL-45: 45°C, LJL-50: 50°C, LJL-55: 55°C, LJL-60: 60°C, LJL-65: 65°C.

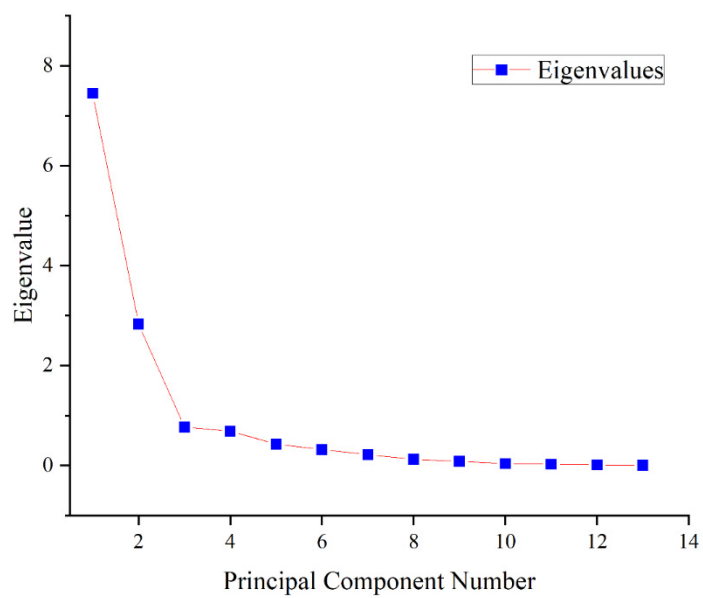

**Figure S3.** Scree plot in PCA analysis

**Table S1.** Reference standards for sensory appearance evaluation

| Reference   | Berry original color       | Glossiness  | Wrinkle    | Integrity           | Wax coating | Acceptability |
|-------------|----------------------------|-------------|------------|---------------------|-------------|---------------|
| 11–15       | –Blue                      | –Glossy     | –Heavily   | –Compact and intact | –Thick      | –Appealing    |
| 6–10        | Purple black–<br>dark-blue | –Moderate–  | –Moderate– | –Moderate–          | –Moderate–  | –Uncertain–   |
| 1–5         | Black–                     | Lackluster– | Slightly–  | Fragmentary–        | Negligible– | Inedible–     |
| Fresh berry | 15                         | 11          | 5          | 15                  | 15          | 11            |

**Table S2.** Reference standards for sensory flavor evaluation

| Reference   | Sweetness | Sour     | Bitterness | Astringency | Smell                 | Acceptability |
|-------------|-----------|----------|------------|-------------|-----------------------|---------------|
| 11–15       | –High     | –Tart    | –High      | –No         | –Original berry aroma | –Enjoyable    |
| 6–10        | –Medium–  | –Medium– | –Medium–   | –Medium–    | –Uncertain smell–     | –Acceptable–  |
| 1–5         | Low–      | No–      | No–        | High–       | Unpleasant odor–      | Unsavory–     |
| Fresh berry | 8         | 8        | 5          | 5           | 15                    | 11            |

**Table S3.** Additional summary of hot-air dehydration of blue honeysuckle berry under temperature range of 35–75°C

| Drying temperature | Initial MoC (%) | Drying time | Final MoC (%)  |
|--------------------|-----------------|-------------|----------------|
| 75°C/167°F         | 88.34% ± 1.17%  | 4 h         | 4.14% ± 0.31%  |
| 70°C/158°F         | 88.16% ± 1.02%  | 5 h         | 4.53% ± 0.28%  |
| 65°C/149°F         | 86.65% ± 1.05%  | 7 h         | 4.33% ± 0.46%  |
| 60°C/140°F         | 86.08% ± 1.54%  | 10 h        | 4.55% ± 0.61%  |
| 55°C/131°F         | 86.98% ± 3.09%  | 18 h        | 4.46% ± 0.72%  |
| 50°C/122°F         | 87.80% ± 1.32%  | 32 h        | 5.06% ± 0.14%  |
| 45°C/113°F         | 88.34% ± 1.28%  | 52 h        | 5.79% ± 0.71%  |
| 40°C/104°F         | 87.59% ± 1.39%  | 72 h        | 7.56% ± 0.46%  |
| 35°C/95°F          | 86.28% ± 1.42%  | *72 h       | 20.39% ± 0.67% |

MoC: moisture content.

**Table S4.** Records of relative moisture content during the dehydration process of blue honeysuckle berries

| Time | 40°C        | 45°C        | 50°C        | 55°C        | 60°C        | 65°C        |
|------|-------------|-------------|-------------|-------------|-------------|-------------|
| 0h   | 1.00 ± 0.00 | 1.00 ± 0.00 | 1.00 ± 0.00 | 1.00 ± 0.00 | 1.00 ± 0.00 | 1.00 ± 0.00 |
| 1h   | NA          | NA          | NA          | NA          | NA          | 0.78 ± 0.03 |
| 2h   | NA          | NA          | 0.88 ± 0.02 | 0.85 ± 0.02 | 0.65 ± 0.01 | 0.45 ± 0.05 |
| 3h   | NA          | NA          | NA          | NA          | NA          | 0.27 ± 0.03 |
| 4h   | 0.92 ± 0.03 | 0.87 ± 0.03 | 0.80 ± 0.01 | 0.67 ± 0.02 | 0.30 ± 0.04 | 0.13 ± 0.03 |
| 5h   | NA          | NA          | NA          | NA          | NA          | 0.07 ± 0.01 |
| 6h   | NA          | NA          | 0.70 ± 0.03 | 0.55 ± 0.02 | 0.11 ± 0.04 | 0.05 ± 0.01 |
| 7h   | NA          | NA          | NA          | NA          | NA          | 0.02 ± 0.01 |
| 8h   | 0.88 ± 0.02 | 0.74 ± 0.02 | 0.64 ± 0.02 | 0.42 ± 0.03 | 0.05 ± 0.02 | NA          |
| 10h  | NA          | NA          | 0.57 ± 0.03 | 0.31 ± 0.05 | 0.02 ± 0.01 | NA          |
| 12h  | 0.8 ± 0.03  | 0.63 ± 0.04 | 0.49 ± 0.04 | 0.20 ± 0.03 | NA          | NA          |
| 14h  | NA          | NA          | 0.40 ± 0.04 | 0.11 ± 0.02 | NA          | NA          |
| 16h  | 0.72 ± 0.02 | 0.53 ± 0.03 | 0.33 ± 0.06 | 0.08 ± 0.02 | NA          | NA          |
| 18h  | NA          | NA          | 0.27 ± 0.06 | 0.05 ± 0.02 | NA          | NA          |
| 20h  | 0.66 ± 0.03 | 0.40 ± 0.05 | 0.21 ± 0.04 | NA          | NA          | NA          |
| 22h  | NA          | NA          | 0.16 ± 0.05 | NA          | NA          | NA          |
| 24h  | 0.61 ± 0.03 | 0.31 ± 0.04 | 0.11 ± 0.03 | NA          | NA          | NA          |
| 26h  | NA          | NA          | 0.09 ± 0.02 | NA          | NA          | NA          |
| 28h  | 0.54 ± 0.03 | 0.22 ± 0.05 | 0.08 ± 0.03 | NA          | NA          | NA          |
| 30h  | NA          | NA          | 0.07 ± 0.02 | NA          | NA          | NA          |
| 32h  | 0.46 ± 0.03 | 0.17 ± 0.02 | 0.06 ± 0.02 | NA          | NA          | NA          |
| 36h  | 0.41 ± 0.04 | 0.15 ± 0.02 | NA          | NA          | NA          | NA          |
| 40h  | 0.38 ± 0.05 | 0.13 ± 0.02 | NA          | NA          | NA          | NA          |
| 44h  | 0.36 ± 0.05 | 0.12 ± 0.02 | NA          | NA          | NA          | NA          |
| 48h  | 0.32 ± 0.03 | 0.10 ± 0.01 | NA          | NA          | NA          | NA          |
| 52h  | 0.29 ± 0.05 | 0.09 ± 0.01 | NA          | NA          | NA          | NA          |
| 56h  | 0.26 ± 0.03 | NA          | NA          | NA          | NA          | NA          |
| 60h  | 0.23 ± 0.02 | NA          | NA          | NA          | NA          | NA          |
| 64h  | 0.20 ± 0.01 | NA          | NA          | NA          | NA          | NA          |
| 68h  | 0.17 ± 0.01 | NA          | NA          | NA          | NA          | NA          |
| 72h  | 0.14 ± 0.01 | NA          | NA          | NA          | NA          | NA          |

**Table S5.** ANOVA statistics of for MoC and relative MoC of treatment groups of 40°C to 75°C

| Drying temperature | Final MoC (g H <sub>2</sub> O/g DW) | Final relative MoC (%) |
|--------------------|-------------------------------------|------------------------|
| 75°C/167°F         | 0.37 ± 0.08 de                      | 0.91 ± 0.70 d          |
| 70°C/158°F         | 0.43 ± 0.16 de                      | 4.61 ± 1.57 c          |
| 65°C/149°F         | 0.24 ± 0.03 e                       | 2.39 ± 0.54 d          |
| 60°C/140°F         | 0.21 ± 0.07 e                       | 1.93 ± 0.85 d          |
| 55°C/131°F         | 0.48 ± 0.19 de                      | 4.96 ± 1.53 c          |
| 50°C/122°F         | 0.54 ± 0.20 cd                      | 6.21 ± 1.98 c          |
| 45°C/113°F         | 0.75 ± 0.14 b                       | 8.82 ± 1.40 b          |
| 40°C/104°F         | 1.10 ± 0.19 a                       | 14.46 ± 0.83 a         |

Different letters indicate significant difference ( $p < 0.05$ ).



**Table S6.** Statistics of sensory appearance evaluation

| Drying temperature | Color          | Glossiness     | Wrinkle        | Integrity      | Wax            | Acceptability  |
|--------------------|----------------|----------------|----------------|----------------|----------------|----------------|
| 40°C               | 11.50 ± 1.88 a | 6.70 ± 1.45 bc | 3.95 ± 1.82 e  | 13.90 ± 0.97 a | 12.85 ± 1.35 a | 10.15 ± 3.59 a |
| 45°C               | 9.10 ± 2.57 b  | 5.15 ± 1.35 d  | 5.70 ± 2.47 d  | 12.95 ± 1.47 b | 8.85 ± 1.73 b  | 8.55 ± 3.53 bc |
| 50°C               | 6.70 ± 1.75 c  | 8.60 ± 2.28 a  | 6.70 ± 2.11 cd | 8.20 ± 1.88 c  | 4.20 ± 1.67 c  | 7.65 ± 3.12 cd |
| 55°C               | 4.00 ± 1.56 d  | 5.95 ± 1.90 cd | 7.95 ± 2.50 c  | 5.95 ± 1.39 d  | 1.95 ± 0.89 d  | 6.90 ± 2.10 cd |
| 60°C               | 2.80 ± 1.40 e  | 7.55 ± 1.67 b  | 10.80 ± 1.82 b | 4.65 ± 1.35 e  | 1.30 ± 0.57 d  | 6.00 ± 2.49 de |
| 65°C               | 2.40 ± 1.10 e  | 2.50 ± 0.83 e  | 12.30 ± 1.72 a | 3.05 ± 1.05 f  | 1.20 ± 0.41 d  | 4.15 ± 2.91 e  |

**Table S7.** Statistics of sensory flavor evaluation

| Drying temperature | Sweetness      | Sourness       | Bitterness     | Astringency    | Smell          | Acceptability  |
|--------------------|----------------|----------------|----------------|----------------|----------------|----------------|
| 40°C               | 2.10 ± 1.17 e  | 9.70 ± 2.79 a  | 11.15 ± 3.34 a | 8.65 ± 3.38 a  | 11.25 ± 2.00 a | 2.75 ± 1.62 e  |
| 45°C               | 3.40 ± 1.39 cd | 6.75 ± 2.31 b  | 8.85 ± 2.48 b  | 7.35 ± 1.73 ab | 9.75 ± 2.31 ab | 4.30 ± 2.52 de |
| 50°C               | 7.10 ± 2.27 a  | 5.90 ± 2.17 bc | 5.70 ± 2.36 c  | 6.00 ± 1.86 b  | 8.85 ± 2.68 b  | 8.10 ± 3.40 a  |
| 55°C               | 5.85 ± 1.79 b  | 4.80 ± 1.47 c  | 4.65 ± 2.23 c  | 4.50 ± 2.33 c  | 7.15 ± 2.90 c  | 7.60 ± 3.38 ab |
| 60°C               | 4.30 ± 1.69 c  | 3.30 ± 1.30 d  | 3.20 ± 1.82 d  | 3.45 ± 2.14 cd | 5.85 ± 2.54 cd | 5.35 ± 2.70 cd |
| 65°C               | 2.75 ± 1.07 de | 1.95 ± 0.76 e  | 1.50 ± 0.69 e  | 2.50 ± 1.54 d  | 4.90 ± 2.69 d  | 6.20 ± 2.44 bc |

**Table S8.** Loss of bifunctional compounds of hot-air dried blue honeysuckle berries

| Treatment | Fresh weight (g) | Dry weight (g) | Index | Loss of AsA | Loss of TpC | Loss of Tfc | Loss of TaC |
|-----------|------------------|----------------|-------|-------------|-------------|-------------|-------------|
| LJL-40    | 30.93            | 8.04           | 3.85  | 50.29%      | 14.71%      | 9.74%       | 31.53%      |
| LJL-45    | 31.24            | 6.37           | 4.91  | 54.42%      | 34.03%      | 17.42%      | 41.02%      |
| LJL-50    | 30.74            | 5.72           | 5.37  | 57.56%      | 51.03%      | 21.05%      | 45.42%      |
| LJL-55    | 30.21            | 5.15           | 5.86  | 58.82%      | 57.97%      | 22.50%      | 48.59%      |
| LJL-60    | 32.11            | 5.38           | 5.97  | 64.31%      | 61.74%      | 24.10%      | 58.93%      |
| LJL-65    | 31.17            | 5.15           | 6.05  | 71.07%      | 65.82%      | 29.89%      | 67.27%      |

Note: The levels of AsA, TpC, Tfc, and TaC in fresh blue honeysuckle berries were 0.62 mg/g, 31.98 mg/g, 5.34 mg/g, and 4.64 mg/g respectively; the loss of these compounds was calculated using the formula:  $\{1 - [\text{value of dried berry} / (\text{Index} \times \text{value of fresh berry})]\} \times 100\%$ . The values of the dried berries are shown in Table 3.

**Table S9.** Loss of antioxidant activities of hot-air dried blue honeysuckle berries

| Treatment | Fresh weight (g) | Dry weight (g) | Index | Loss of DPPH | Loss of ABTS | Loss of FRAP |
|-----------|------------------|----------------|-------|--------------|--------------|--------------|
| LJL-40    | 30.93            | 8.04           | 3.85  | 36.40%       | 68.55%       | 72.38%       |
| LJL-45    | 31.24            | 6.37           | 4.91  | 41.66%       | 73.86%       | 77.15%       |
| LJL-50    | 30.74            | 5.72           | 5.37  | 53.92%       | 78.40%       | 79.31%       |
| LJL-55    | 30.21            | 5.15           | 5.86  | 62.37%       | 80.66%       | 81.66%       |
| LJL-60    | 32.11            | 5.38           | 5.97  | 72.56%       | 83.43%       | 85.15%       |
| LJL-65    | 31.17            | 5.15           | 6.05  | 83.78%       | 84.25%       | 86.10%       |

Note: the DPPH, ABTS, and FRAP of fresh blue honeysuckle berry were 278.72  $\mu\text{mol TE/g}$ , 618.15  $\mu\text{mol TE/g}$ , and 521.76  $\mu\text{mol TE/g}$  respectively; the loss of these activities was calculated using the formula:  $\{1 - [\text{value of dried berry} / (\text{Index} \times \text{value of fresh berry})]\} \times 100\%$ . The values of the dried berries are shown in Table 4.

**Table S10.** *R* value matrix of the quality attributes of the dried blue honeysuckle berries

| rValue | MoC     | SS      | TA      | L*      | a*      | b*      | AsA     | TpC     | TfC     | TaC     | DHHP    | ABTS    | FRAP    |
|--------|---------|---------|---------|---------|---------|---------|---------|---------|---------|---------|---------|---------|---------|
| MoC    | 1       | -0.8739 | -0.6745 | 0.7388  | 0.0737  | -0.8176 | 0.0035  | 0.8623  | -0.6390 | 0.4149  | 0.6222  | 0.7417  | 0.4910  |
| SS     | -0.8739 | 1       | 0.6368  | -0.6927 | 0.1510  | 0.7495  | 0.1588  | -0.7623 | 0.5077  | -0.2949 | -0.5062 | -0.5393 | -0.3139 |
| TA     | -0.6745 | 0.6368  | 1       | -0.7710 | -0.2858 | 0.4939  | -0.5588 | -0.7205 | 0.1911  | -0.8281 | -0.8341 | -0.7624 | -0.5477 |
| L*     | 0.7388  | -0.6927 | -0.7710 | 1       | 0.1144  | -0.6707 | 0.1555  | 0.7197  | -0.5229 | 0.5917  | 0.7863  | 0.8073  | 0.5678  |
| a*     | 0.0737  | 0.1510  | -0.2858 | 0.1144  | 1       | 0.1331  | 0.5882  | 0.0052  | 0.1054  | 0.5692  | 0.3300  | 0.1873  | 0.2755  |
| b*     | -0.8176 | 0.7495  | 0.4939  | -0.6707 | 0.1331  | 1       | 0.0676  | -0.8840 | 0.5756  | -0.2357 | -0.6089 | -0.7033 | -0.5993 |
| AsA    | 0.0035  | 0.1588  | -0.5588 | 0.1555  | 0.5882  | 0.0676  | 1       | 0.1792  | 0.3378  | 0.8342  | 0.5360  | 0.4201  | 0.5726  |
| TpC    | 0.8623  | -0.7623 | -0.7205 | 0.7197  | 0.0052  | -0.8840 | 0.1792  | 1       | -0.4322 | 0.4793  | 0.7915  | 0.8482  | 0.5793  |
| TfC    | -0.6390 | 0.5077  | 0.1911  | -0.5229 | 0.1054  | 0.5756  | 0.3378  | -0.4322 | 1       | -0.0088 | -0.2101 | -0.3877 | -0.3220 |
| TaC    | 0.4149  | -0.2949 | -0.8281 | 0.5917  | 0.5692  | -0.2357 | 0.8342  | 0.4793  | -0.0088 | 1       | 0.8076  | 0.7122  | 0.6910  |
| DHHP   | 0.6222  | -0.5062 | -0.8341 | 0.7863  | 0.3300  | -0.6089 | 0.5360  | 0.7915  | -0.2101 | 0.8076  | 1       | 0.8497  | 0.6831  |
| ABTS   | 0.7417  | -0.5393 | -0.7624 | 0.8073  | 0.1873  | -0.7033 | 0.4201  | 0.8482  | -0.3877 | 0.7122  | 0.8497  | 1       | 0.7050  |
| FRAP   | 0.4910  | -0.3139 | -0.5477 | 0.5678  | 0.2755  | -0.5993 | 0.5726  | 0.5793  | -0.3220 | 0.6910  | 0.6831  | 0.7050  | 1       |

**Table S11.** *P* value matrix of the quality attributes of the dried blue honeysuckle berries

| <b>pValue</b> | MoC      | SS       | TA       | L*       | a*       | b*       | AsA      | TpC      | TfC      | TaC      | DHHP     | ABTS     | FRAP     |
|---------------|----------|----------|----------|----------|----------|----------|----------|----------|----------|----------|----------|----------|----------|
| MoC           | 1        | 0.000002 | 0.002139 | 0.000461 | 0.771400 | 0.000034 | 0.989104 | 0.000004 | 0.004306 | 0.086904 | 0.005832 | 0.000427 | 0.038521 |
| SS            | 0.000002 | 1        | 0.004487 | 0.001440 | 0.549647 | 0.000343 | 0.529227 | 0.000235 | 0.031485 | 0.234909 | 0.032059 | 0.020893 | 0.204540 |
| TA            | 0.002139 | 0.004487 | 1        | 0.000180 | 0.250215 | 0.037231 | 0.015922 | 0.000744 | 0.447540 | 0.000022 | 0.000017 | 0.000235 | 0.018634 |
| L*            | 0.000461 | 0.001440 | 0.000180 | 1        | 0.651252 | 0.002317 | 0.537899 | 0.000758 | 0.025989 | 0.009685 | 0.000109 | 0.000051 | 0.013976 |
| a*            | 0.771400 | 0.549647 | 0.250215 | 0.651252 | 1        | 0.598498 | 0.010247 | 0.983683 | 0.677188 | 0.013691 | 0.181041 | 0.456649 | 0.268491 |
| b*            | 0.000034 | 0.000343 | 0.037231 | 0.002317 | 0.598498 | 1        | 0.789811 | 0.000001 | 0.012432 | 0.346349 | 0.007320 | 0.001130 | 0.008571 |
| AsA           | 0.989104 | 0.529227 | 0.015922 | 0.537899 | 0.010247 | 0.789811 | 1        | 0.476896 | 0.170380 | 0.000017 | 0.021857 | 0.082602 | 0.013002 |
| TpC           | 0.000004 | 0.000235 | 0.000744 | 0.000758 | 0.983683 | 0.000001 | 0.476896 | 1        | 0.073259 | 0.044153 | 0.000091 | 0.000009 | 0.011759 |
| TfC           | 0.004306 | 0.031485 | 0.447540 | 0.025989 | 0.677188 | 0.012432 | 0.170380 | 0.073259 | 1        | 0.972230 | 0.402764 | 0.111903 | 0.192481 |
| TaC           | 0.086904 | 0.234909 | 0.000022 | 0.009685 | 0.013691 | 0.346349 | 0.000017 | 0.044153 | 0.972230 | 1        | 0.000051 | 0.000912 | 0.001495 |
| DHHP          | 0.005832 | 0.032059 | 0.000017 | 0.000109 | 0.181041 | 0.007320 | 0.021857 | 0.000091 | 0.402764 | 0.000051 | 1        | 0.000008 | 0.001781 |
| ABTS          | 0.000427 | 0.020893 | 0.000235 | 0.000051 | 0.456649 | 0.001130 | 0.082602 | 0.000009 | 0.111903 | 0.000912 | 0.000008 | 1        | 0.001085 |
| FRAP          | 0.038521 | 0.204540 | 0.018634 | 0.013976 | 0.268491 | 0.008571 | 0.013002 | 0.011759 | 0.192481 | 0.001495 | 0.001781 | 0.001085 | 1        |

**Table S12.** Loading statistics of the attributes in PCA analysis

| Attributes | Loadings |          |          |          |          |
|------------|----------|----------|----------|----------|----------|
|            | PC1      | PC2      | PC3      | PC4      | PC5      |
| MoC        | 0.31494  | -0.22053 | 0.07240  | -0.23243 | 0.25978  |
| SS         | -0.26958 | 0.2929   | 0.24115  | 0.33073  | -0.12204 |
| TA         | -0.31927 | -0.14011 | 0.29013  | 0.27388  | 0.19144  |
| L*         | 0.32094  | -0.07746 | 0.01721  | -0.16108 | -0.50960 |
| a*         | 0.08409  | 0.40872  | 0.51622  | -0.48643 | 0.44209  |
| b*         | -0.29011 | 0.27314  | -0.02851 | -0.29953 | -0.37541 |
| AsA        | 0.14281  | 0.52247  | -0.05751 | 0.18019  | 0.02303  |
| TpC        | 0.33072  | -0.13673 | -0.18447 | 0.12052  | 0.35055  |
| TfC        | -0.17232 | 0.35054  | -0.65485 | 0.05911  | 0.33830  |
| TaC        | 0.27245  | 0.37108  | -0.02549 | -0.09962 | -0.19084 |
| DPPH       | 0.32956  | 0.14875  | -0.12920 | 0.03998  | -0.04328 |
| ABTS       | 0.33761  | 0.03884  | -0.01178 | 0.17570  | -0.09349 |
| FRAP       | 0.27510  | 0.14969  | 0.31811  | 0.56252  | 0.00280  |

**Table S13.** Score report of the samples in PCA analysis

| Samples  | Scores   |          |          |          |          |
|----------|----------|----------|----------|----------|----------|
|          | PC1      | PC2      | PC3      | PC4      | PC5      |
| LJL-40-1 | 1.15779  | -1.37108 | -0.76635 | 1.56796  | 0.65973  |
| LJL-40-2 | 1.18671  | -1.44691 | -0.82016 | -1.45149 | 0.26685  |
| LJL-40-3 | 1.00489  | -1.75064 | 0.71954  | -1.28756 | -1.38328 |
| LJL-45-1 | 0.80780  | 0.18860  | -0.65089 | -0.39503 | -0.14719 |
| LJL-45-2 | 0.88841  | 0.29215  | -1.45705 | 1.14072  | 0.16369  |
| LJL-45-3 | 1.05343  | -0.12387 | 1.58512  | 1.24529  | 1.26777  |
| LJL-50-1 | 0.41976  | 0.78865  | 1.45166  | 0.69166  | -1.86075 |
| LJL-50-2 | 0.24088  | 0.82233  | -0.17372 | -0.88407 | 0.48908  |
| LJL-50-3 | 0.66127  | 1.01560  | 0.82878  | -1.22961 | 1.19969  |
| LJL-55-1 | -0.18209 | 0.85413  | -1.04874 | -0.29107 | -1.51390 |
| LJL-55-2 | 0.22037  | 1.27894  | 1.18969  | 0.32759  | 0.78094  |
| LJL-55-3 | -0.02326 | 1.43529  | -0.61983 | 0.41801  | -0.13958 |
| LJL-60-1 | -0.69322 | 0.28135  | 0.65909  | -0.32890 | -1.46346 |
| LJL-60-2 | -0.94444 | 0.04381  | -1.22902 | 0.40164  | -0.57777 |
| LJL-60-3 | -1.13817 | 0.48966  | -1.15463 | -0.56811 | 1.10586  |
| LJL-65-1 | -1.42257 | -1.21984 | 0.66269  | 1.45435  | -0.27345 |
| LJL-65-2 | -1.57661 | -0.87984 | -0.02553 | 0.48694  | 0.52229  |
| LJL-65-3 | -1.66095 | -0.69834 | 0.84935  | -1.29832 | 0.90348  |
